# Supplementary material for: Synergistic effects of nitrogen doping in waste-fruit peel–derived activated carbons for supercapacitors and water treatment
Source: Royal Society of Chemistry journal article supplement (doi:10.1039/d6ra02137a), 2026-05-14
Supplement: d6ra02137a1.pdf [file d6ra02137a1.pdf]

## Synergistic Effects of Nitrogen Doping in Waste-Fruit Peel–Derived Activated Carbons for Supercapacitors and Water Treatment

Vianney Kitenge<sup>a,b,\*</sup>, Ndeye Fatou Diop<sup>a</sup>, Souleyman Thior<sup>a</sup>, Adama Fall<sup>b</sup>, Kabir Otun<sup>a</sup>, Gift Rutavi<sup>a</sup>, Itani Madiba<sup>b</sup>, Ncholu Manyala<sup>a</sup>, Mohamed Chaker<sup>c</sup>, and Malik Maaza<sup>b</sup>

<sup>a</sup>Department of Physics, SARChI Chair in Nanomaterials for Energy storage and Water purification applications, University of Pretoria, Pretoria 0002, South Africa

<sup>b</sup>UNESCO-UNISA Africa Chair in Nanosciences & Nanotechnology Laboratories, College of Graduate Studies, University of South Africa, Muckleneuk Ridge, P.O. Box 392, Pretoria 0003, South Africa

<sup>c</sup>Institut National de la Recherche Scientifique Centre – Énergie Matériaux Télécommunications, 1650, Boul. Lionel Boulet, Varennes, Québec J3X 1S2 Canada

\*Corresponding authors' email: [Vianney.kitenge@up.ac.za](mailto:Vianney.kitenge@up.ac.za), [Ncholu.manyala@up.ac.za](mailto:Ncholu.manyala@up.ac.za)

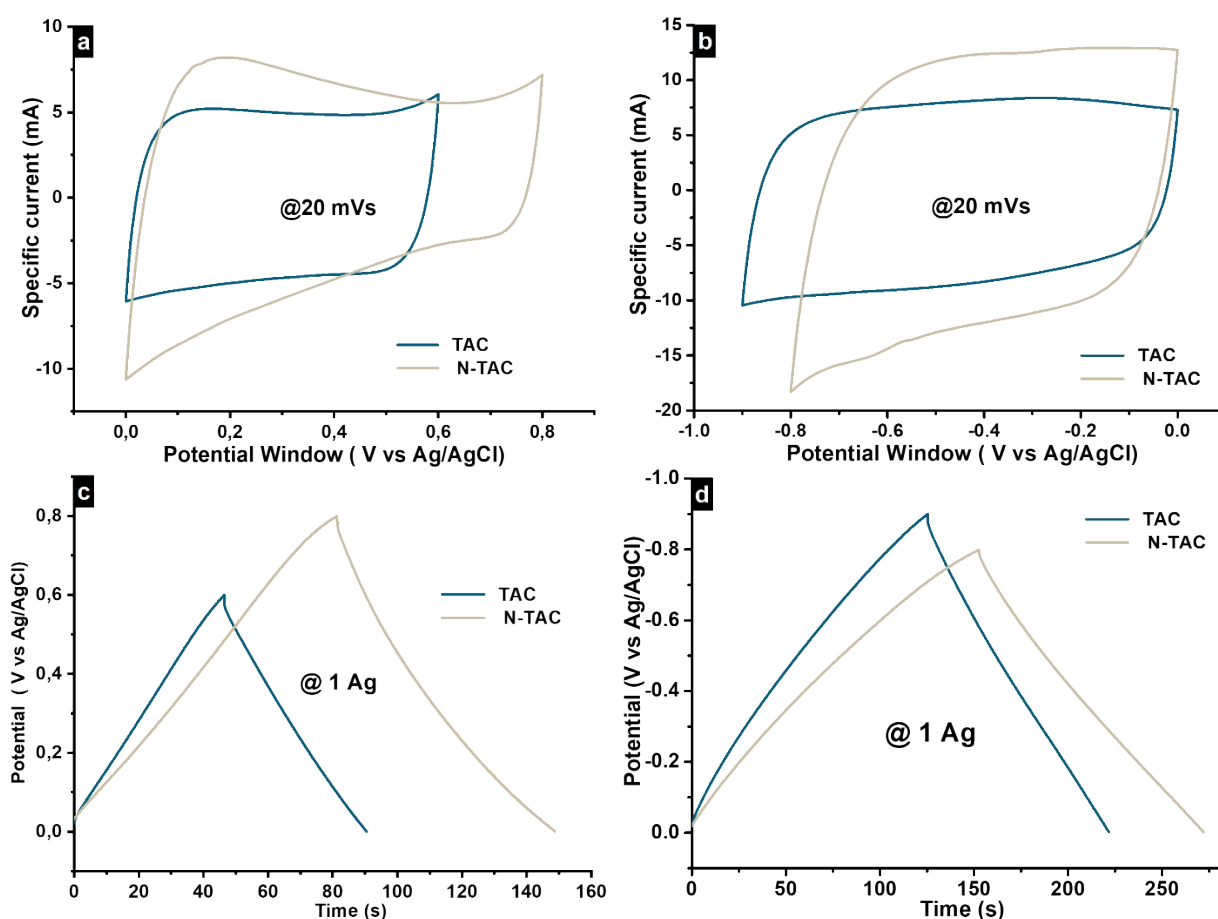

**Figure S. 1:** Three-electrode electrochemical characterisation of TAC and N-TAC electrodes: cyclic voltammetry (CV) curves recorded at a scan rate of 20 mV s<sup>-1</sup> within the (a) positive and (b) negative potential windows; galvanostatic charge–discharge (GCD) profiles at a specific current of 0.5 A g<sup>-1</sup> within the (c) positive and (d) negative potential windows.

## Power Law Relationship

The dependence of the current response on scan rate in cyclic voltammetry (CV) follows a power law relationship:

$$I = av^b \quad (\text{S1})$$

where  $I$  is the current (A),  $v$  is the scan rate ( $\text{V s}^{-1}$ ),  $a$  is a constant, and  $b$  is the power-law exponent.

For convenient determination of  $b$ , Eq. (S1) is expressed in logarithmic form:

$$\log I = \log a + b \log v \quad (\text{S2})$$

A plot of  $\log I$  versus  $\log v$  yields a linear relationship, where the slope corresponds to  $b$  and the intercept to  $\log a$ . The  $b$ -value provides insight into the charge storage mechanism:  $b \approx 0.5$  indicates a diffusion-controlled (pseudocapacitive, PC) process, whereas  $b \approx 1.0$  suggests a surface-controlled process dominated by electric double-layer capacitance (EDLC). The corresponding plots for N-TAC at selected potentials in both positive and negative windows are presented in Figure S.1.

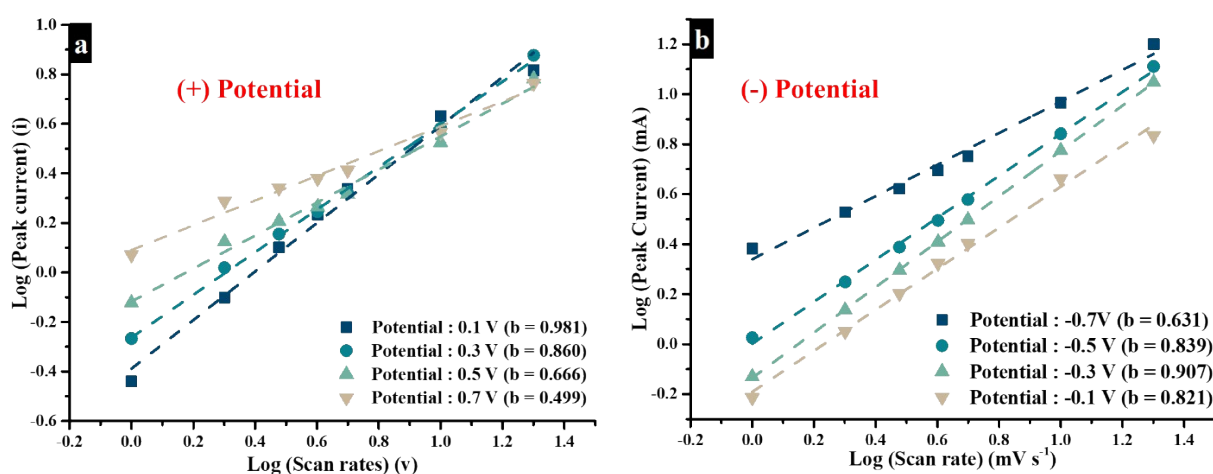

**Figure S. 2 :** Log( $i$ ) versus log( $v$ ) plots with linear regression at fixed potentials for the positive (a) (0.1–0.7 V) and negative (b) (–0.1 to –0.7 V) windows across scan rates of 1–20  $\text{mV s}^{-1}$ . Slopes yield the  $b$ -values in Figure 6(a, b).

## Trasatti's Method

The relative contributions of surface-controlled and diffusion-limited processes were further evaluated using Trasatti's method. The total stored charge ( $Q_T$ ) consists of outer surface charge ( $Q_o$ , EDLC) and inner diffusion-controlled charge ( $Q_i$ , PC).

The specific capacitance was calculated from CV curves (1–20 mV s<sup>-1</sup>) using:

$$C_s = \frac{S}{mv\Delta V} \quad (S3)$$

where  $S$  is the integrated CV area,  $m$  is the mass of active material,  $v$  is the scan rate, and  $\Delta V$  is the potential window.

As  $v \rightarrow \infty$ , ion diffusion into the inner surface becomes negligible, and the intercept of the plot of  $C_s$  versus  $v^{1/2}$  gives the electric double-layer capacitance ( $C_{EDLC}$ ):

$$C_s = kv^{-1/2} + C_{EDLC} \quad (S4)$$

Conversely, as  $v \rightarrow 0$ , ions access both outer and inner surfaces, yielding the total capacitance ( $C_T$ ), obtained from the intercept of the  $C_s^{-1}$  versus  $v^{1/2}$  plot:

$$C_s^{-1} = kv^{1/2} + C_T^{-1} \quad (S5)$$

The pseudocapacitive contribution is calculated as:

$$C_{PC} = C_T - C_{EDLC}$$

The percentage contributions are determined using:

$$C_{EDLC}(\%) = \frac{C_{EDLC}}{C_T} \times 100 \quad (S6)$$

$$C_{PC}(\%) = \frac{C_{PC}}{C_T} \times 100 \quad (S7)$$

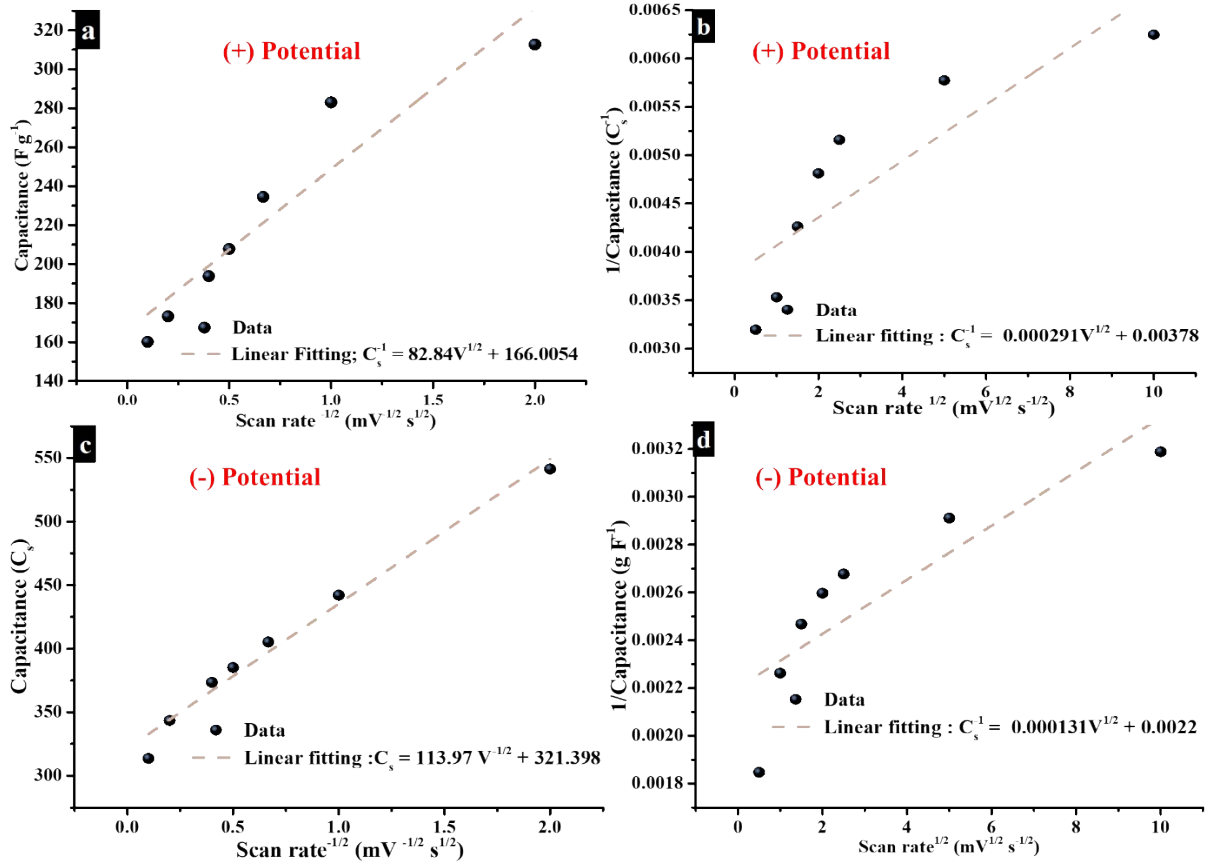

**Figure S. 3** : Trasatti deconvolution plots of  $C_s$  versus  $v^{-1/2}$  for the positive (a) and negative (c) windows, and  $C_s^{-1}$  versus  $v^{1/2}$  for the positive (b) and negative (d) windows. Y-intercept extrapolations to  $v \rightarrow 0$  and  $v \rightarrow \infty$  yield total and outer charge contributions, respectively, reported in Figure 6(c, d).

### Dunn's Method

Dunn's method was employed to separate capacitive and diffusion-controlled contributions at a given potential quantitatively. The total current is expressed as:

$$I = k_1 v + k_2 v^{1/2} \quad (\text{S8})$$

where  $k_1 v$  represents the surface-controlled (EDLC) contribution and  $k_2 v^{1/2}$  the diffusion-controlled (PC) contribution.

Dividing by  $v^{1/2}$  gives:

$$I v^{-1/2} = k_1 v^{1/2} + k_2 \quad (\text{S9})$$

A plot of  $I v^{-1/2}$  versus  $v^{1/2}$  yields a linear relationship, where the slope and intercept correspond to  $k_1$  and  $k_2$ , respectively. The obtained constants were used to quantify EDLC and PC contributions across the entire potential window. The potential-dependent separation and scan-rate evolution of the capacitive contributions for N-TAC are presented in Figures S.3 and S. 7.

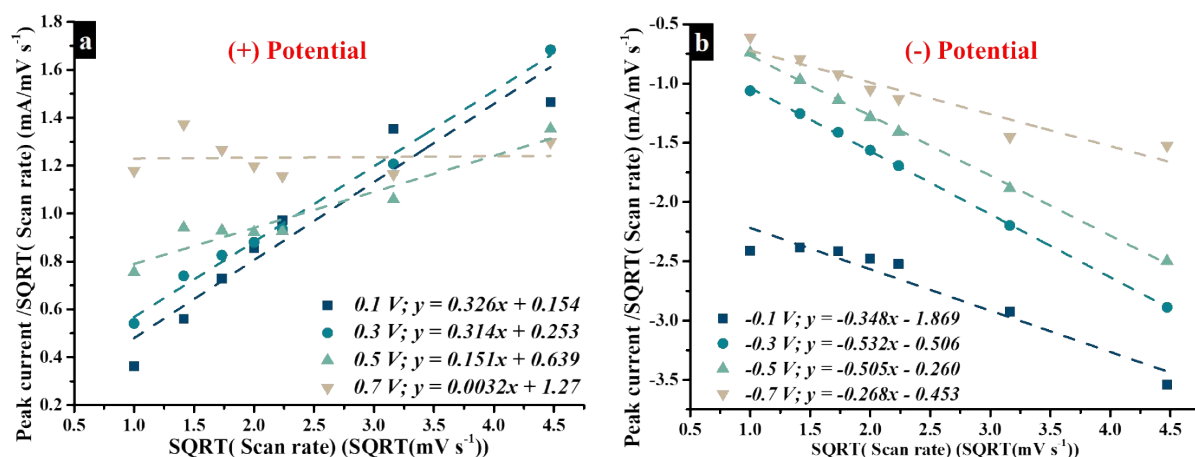

**Figure S. 4:** Plots of  $i_p v^{-1/2}$  versus  $v^{1/2}$  with linear fitting at fixed potentials  $V$  for the (a) positive (0.1, 0.3, 0.5, and 0.7) and (b) negative (-0.1, -0.3, -0.5, and -0.7) potential windows, used to extract the  $k_1$  (slope) and  $k_2$  (intercept) coefficients for Dunn's current separation presented in Figure 7.

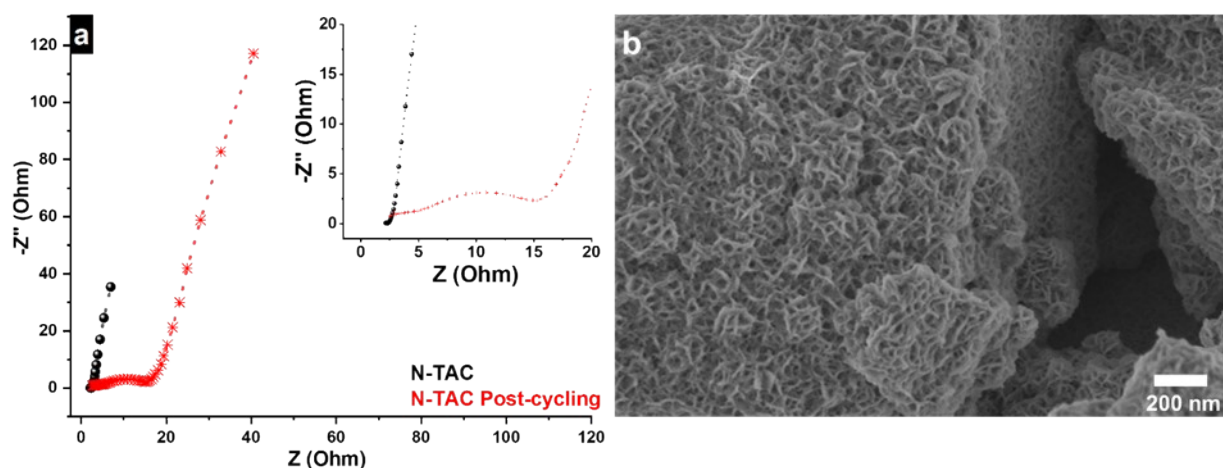

**Figure S. 5:** Post-cycling EIS and SEM

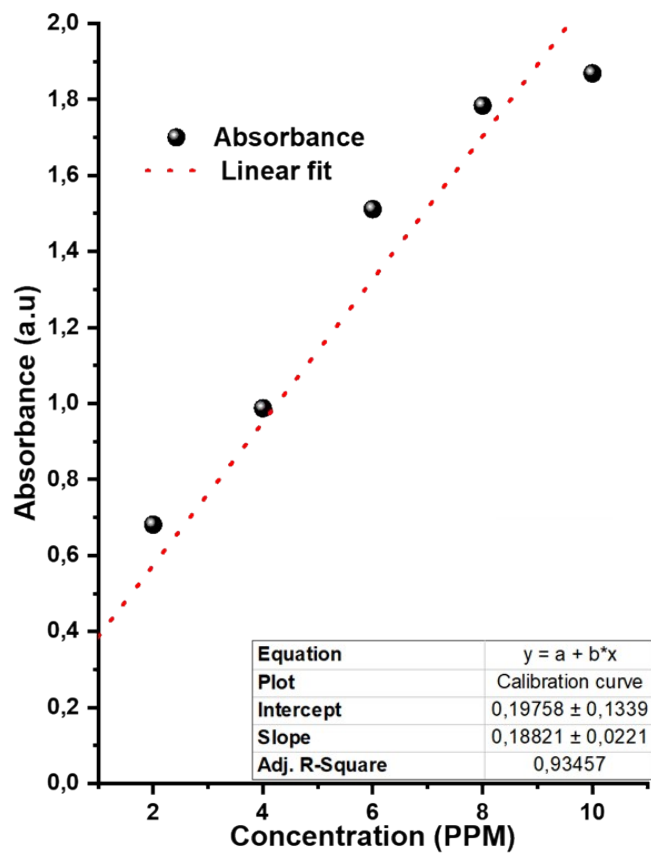

Figure S. 6: Methylene Blue Calibration curve

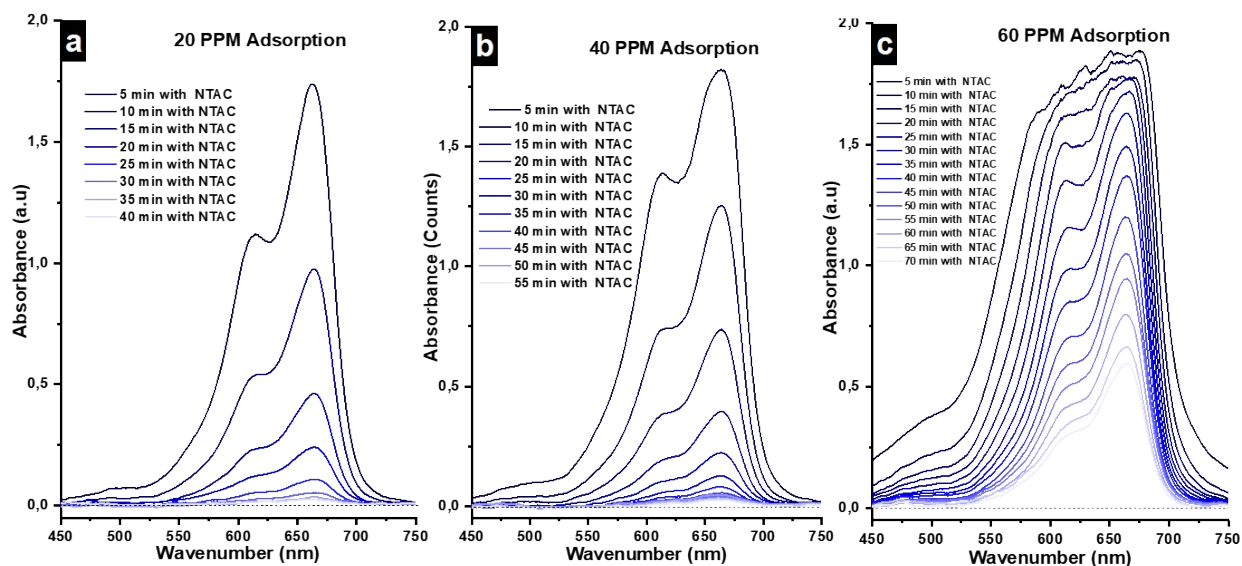

**Figure S. 7:** UV-Visible absorption spectra demonstrating methylene blue adsorption with 10 mg N-TAC at initial dye concentrations of (a) 20 ppm, (b) 40 ppm, and (c) 60 ppm, measured at various time intervals.
